# Supplementary material for: Enhanced photocatalytic activity of Cl-residual rutile TiO2 nanorods after targeted co-modification with phosphoric and boric acids
Source: Royal Society of Chemistry journal article supplement (doi:10.1039/c5cp02084k), 2015-01-01

## Supporting information (S)

Figure S1. XRD patterns of different samples.

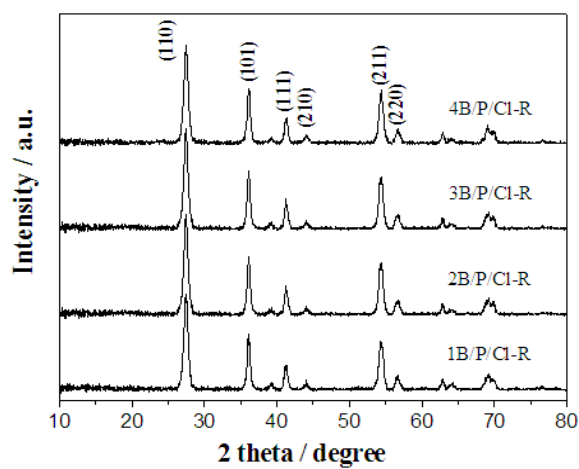

Figure S2. DRS spectra of different samples.

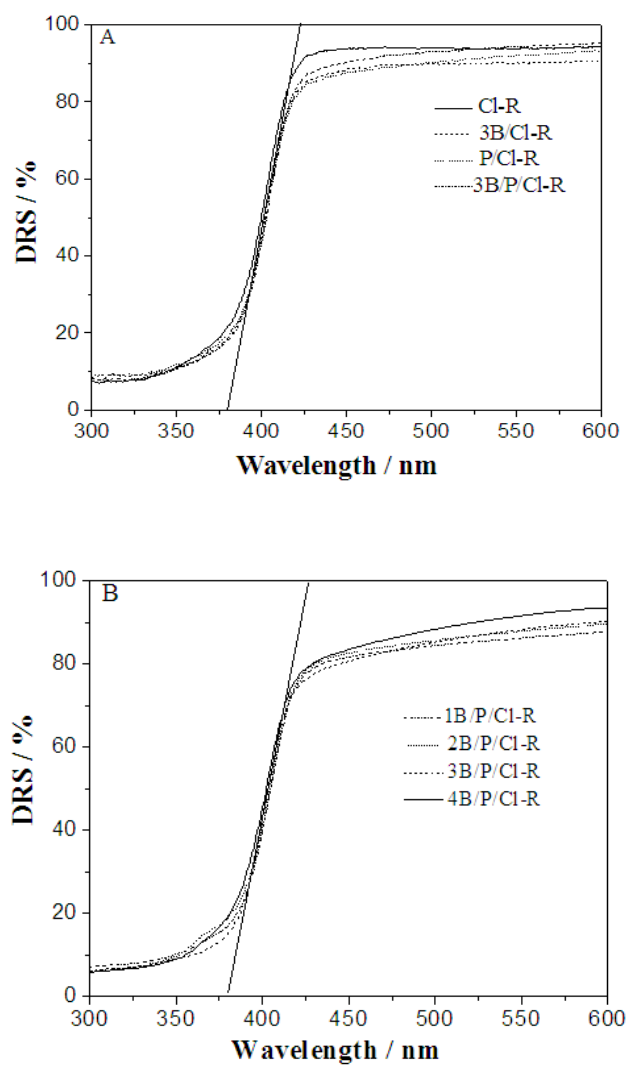

**Figure S3.** XPS spectra of different samples.

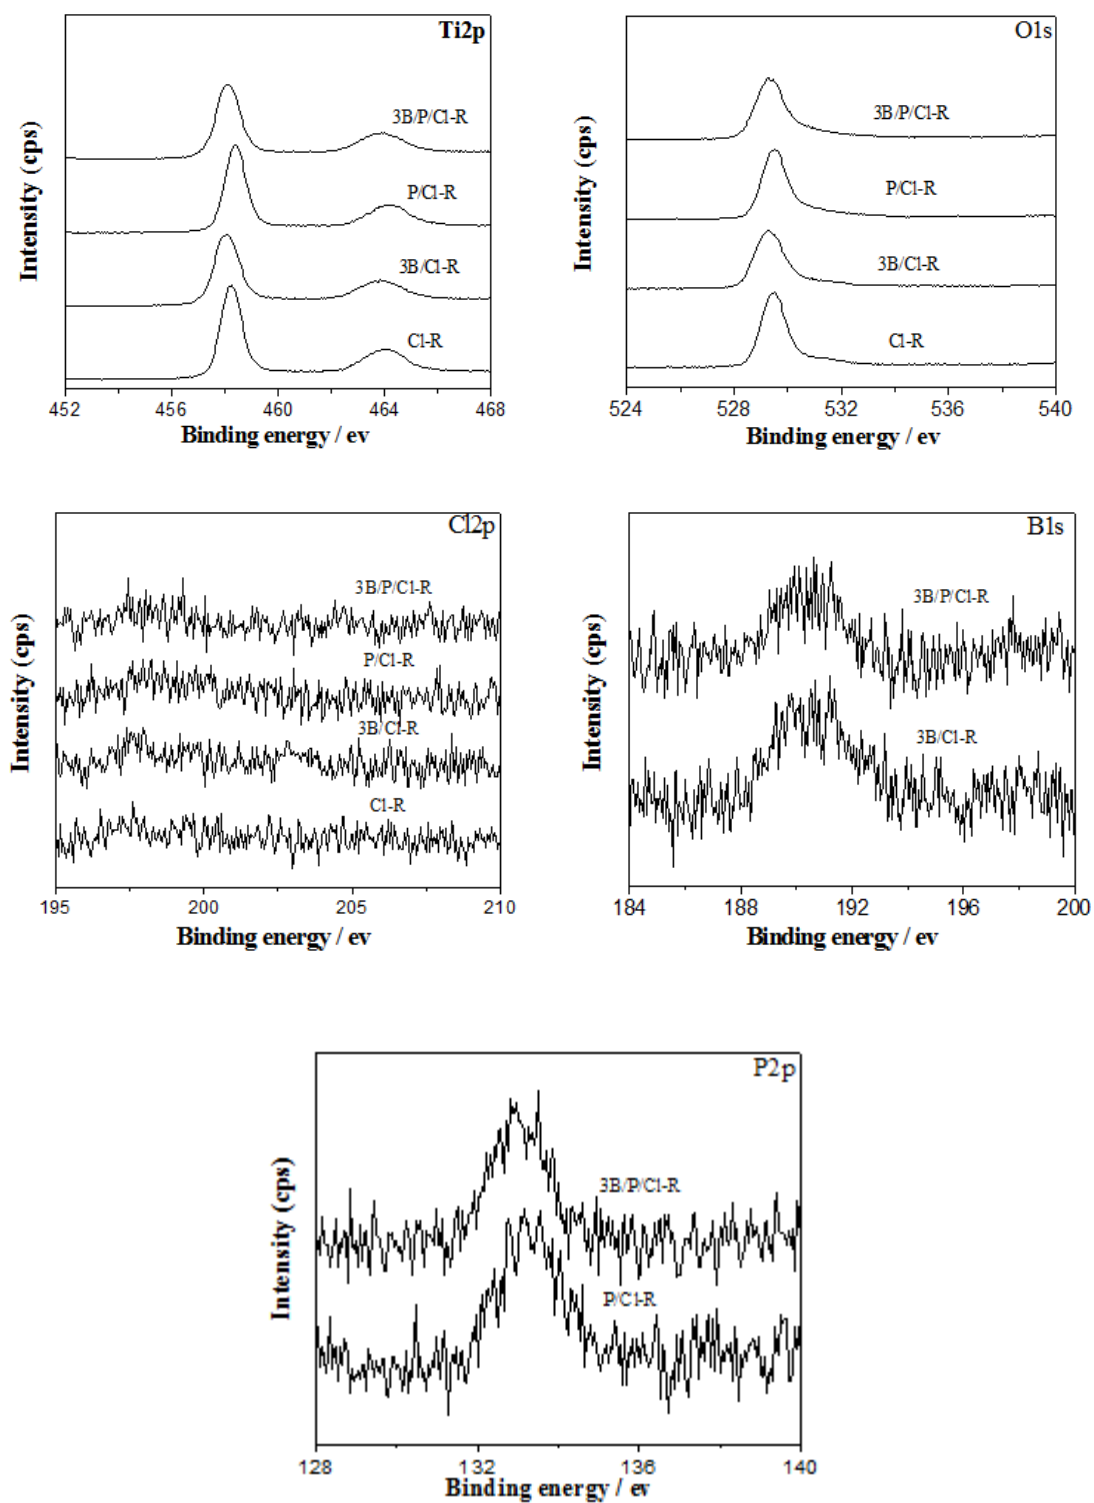

**Figure S4.** SPS responses of different samples in different O<sub>2</sub>-concentration atmospheres.

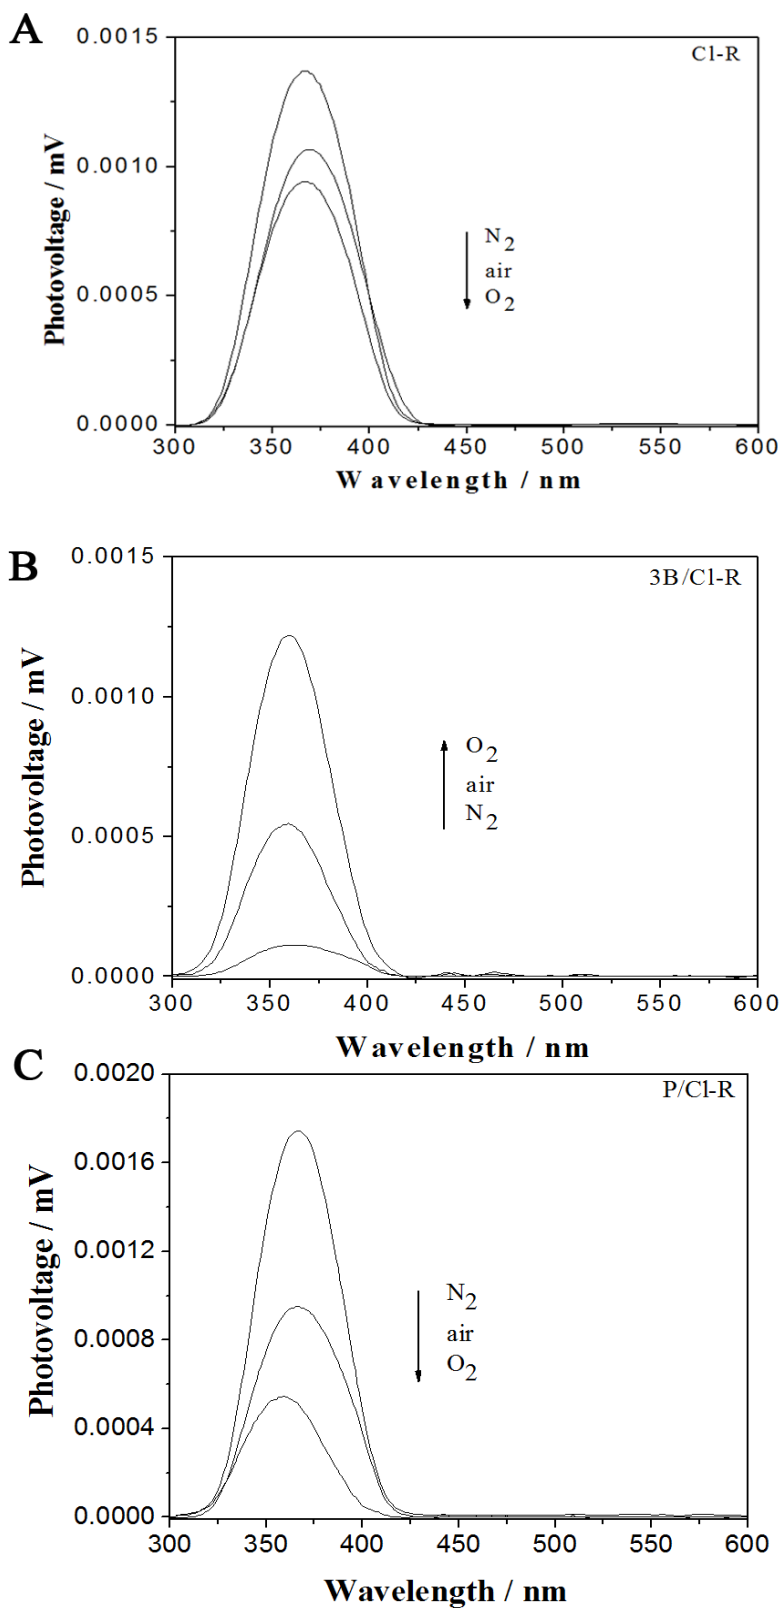

**Figure S5.** SPS responses of different samples in different O<sub>2</sub>-concentration atmospheres.

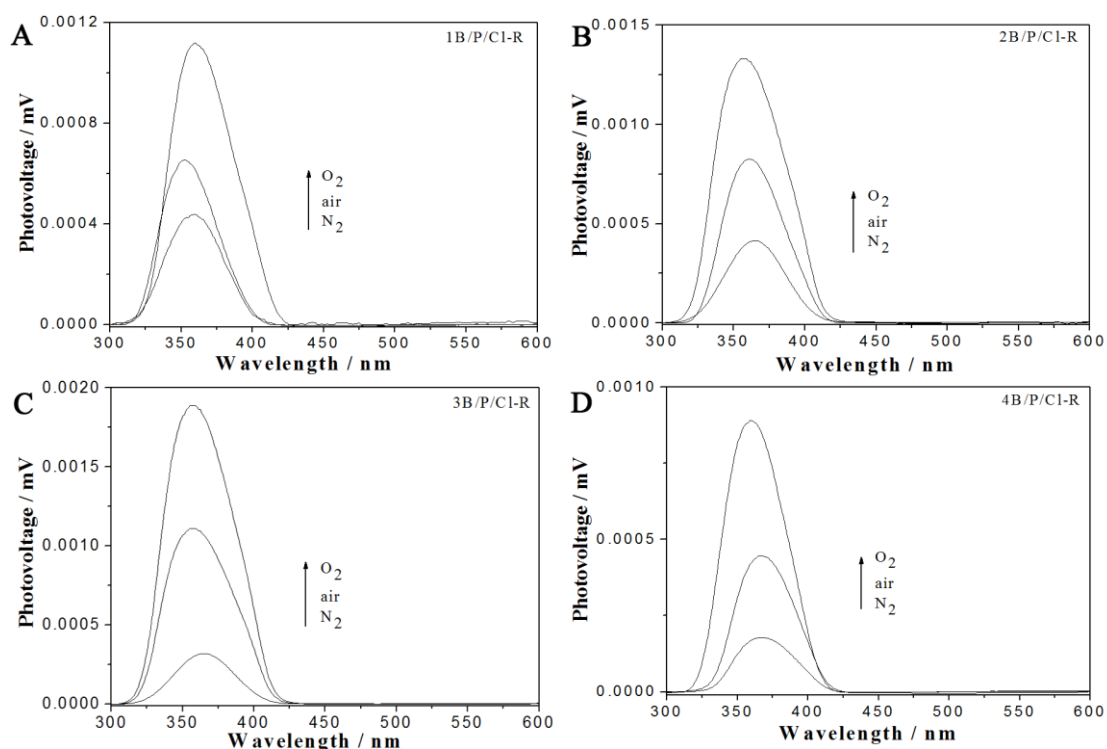

**Figure S6.** Fluorescence spectra related to hydroxyl radicals on different samples after irradiation for 1 h.

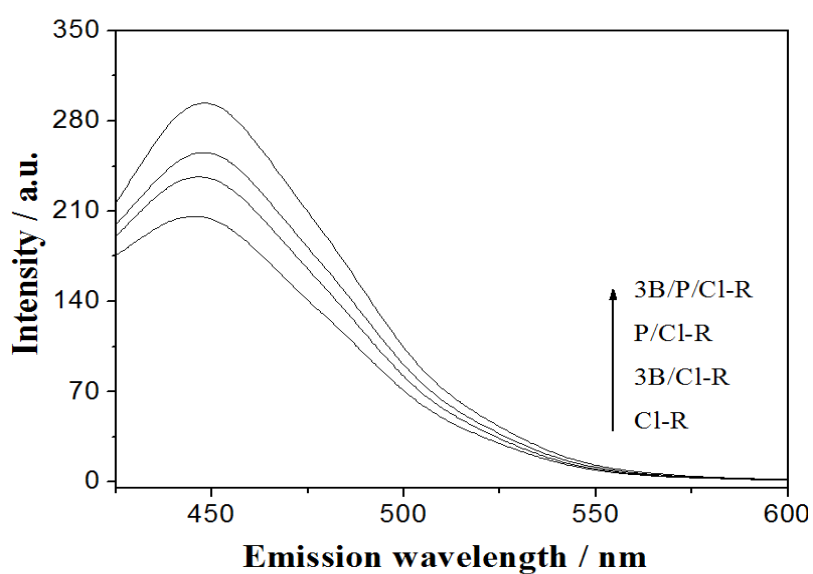

Supplement: c5cp02084k1.pdf [file c5cp02084k1.pdf]
